# Supplementary material
Source: PubMed Central journal article supplement (PMC3766319)
Supplement: NIHMS518193-supplement-Sup_Fig_S1.pdf [file NIHMS518193-supplement-Sup_Fig_S1.pdf]

## **Supplemental Materials**

**Supplemental Figure S1. Overexpression of dnRAR $\alpha$  in CD8<sup>+</sup> T cells renders CD8<sup>+</sup> T cell unresponsive to RA *in vitro*.** A. *Cre-dependent overexpression of dnRAR $\alpha$ .* CD4<sup>+</sup>, CD8<sup>+</sup> T cells and CD19<sup>+</sup> B cells were purified from dnRAR $\alpha$  and dnRAR $\alpha$ CD4<sup>Cre</sup> mice, respectively. Real-time PCR was performed to evaluate the mRNA level of dnRAR $\alpha$  accordingly. B. *Non-responsiveness to RA in vitro.* CD8<sup>+</sup> T cells were purified from dnRAR $\alpha$  or dnRAR $\alpha$ CD4<sup>Cre</sup> mice, and activated *in vitro* with 10 $\mu$ g/ml  $\alpha$ -CD3 and 1 $\mu$ g/ml  $\alpha$ -CD28 in the presence of 10nM RA or DMSO as vehicle control.  $\alpha$ 4 $\beta$ 7 expression was evaluated. Black, dnRAR $\alpha$ CD4<sup>Cre</sup>+DMSO; Blue, dnRAR $\alpha$ CD4<sup>Cre</sup>+RA; Dashed gray, dnRAR $\alpha$ +DMSO; Red, dnRAR $\alpha$ +RA. This is representative of 2 experiments with similar results.

**Supplemental Figure S2. Deficient CD8<sup>+</sup> T cell expansion in response to OVA,  $\alpha$ -CD40 and pI:C immunization in dnRAR $\alpha$ CD4<sup>Cre</sup> mice is independent of CD4<sup>+</sup> T cells.** dnRAR $\alpha$ , dnRAR $\alpha$ CD4<sup>Cre</sup> mice were immunized as in Fig 5 but CD4<sup>+</sup> T cells were depleted on day -2, 1 and 6. Shown is kinetics of CD44<sup>hi</sup>OVA tetramer<sup>+</sup>% of CD8<sup>+</sup> T cells in blood. Data shown is representative of 2 experiments with similar results with n $\geq$ 3 mice/group. Statistically significant differences were determined by 2way ANOVA analysis.
