# Supplementary material
Source: PubMed Central journal article supplement (PMC3766319)

## Sup Fig S2

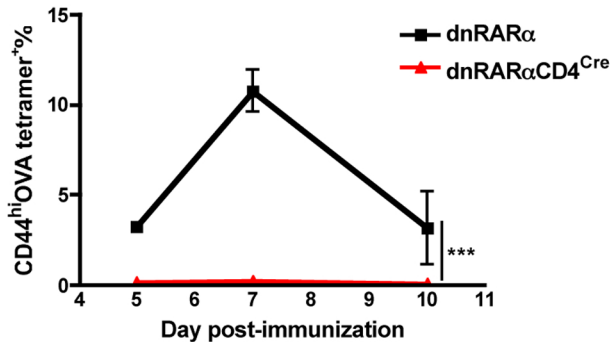

Supplement: NIHMS518193-supplement-Sup_fig_S2.pdf [file NIHMS518193-supplement-Sup_fig_S2.pdf]
